# Supplementary material for: A Longitudinal Study of Exposure to Manganese and Incidence of Metabolic Syndrome
Source: MDPI journal article supplement (doi:10.3390/nu14204271), 2022-10-13
Supplement: s1 [file s1]

**Supplemental Table S1. Distributions <sup>a</sup> of metals (µg/L) at baseline among participants included in the analysis (n = 1478), contrasted by the median Mn value**

|            | All                     | Mn ≤ 0.63               | Mn > 0.63               | n (%) below the limit of detection |
|------------|-------------------------|-------------------------|-------------------------|------------------------------------|
| Arsenic    | 16.12 (7.12, 32.88)     | 14.84 (5.95, 31.84)     | 16.70 (8.25, 34.38)     | 109 (7.4)                          |
| Barium     | 2.16 (1.23, 4.27)       | 1.62 (0.93, 3.10)       | 2.98 (1.69, 5.69)       | 20 (1.4)                           |
| Cadmium    | 0.66 (0.37, 1.20)       | 0.52 (0.29, 0.94)       | 0.85 (0.51, 1.48)       | 69 (4.7)                           |
| Cobalt     | 0.55 (0.33, 0.93)       | 0.47 (0.26, 0.80)       | 0.62 (0.41, 1.07)       | 25 (1.7)                           |
| Chromium   | 0.44 (0.40, 1.51)       | 0.40 (0.38, 0.80)       | 0.59 (0.40, 2.33)       | 444 (30.0)                         |
| Cesium     | 3.37 (2.09, 5.11)       | 2.63 (1.71, 4.08)       | 4.14 (2.79, 6.05)       | 1 (0.1)                            |
| Copper     | 22.85 (13.20, 46.00)    | 14.61 (9.6, 22.59)      | 41.80 (23.62, 67.50)    | 11 (0.7)                           |
| Molybdenum | 36.69 (21.50, 58.01)    | 27.23 (16.75, 44.92)    | 47.35 (30.70, 69.25)    | 6 (0.4)                            |
| Lead       | 2.70 (1.42, 7.46)       | 1.91 (1.09, 5.24)       | 3.73 (2.02, 10.60)      | 22 (1.5)                           |
| Selenium   | 37.66 (22.29, 57.27)    | 29.88 (17.63, 46.43)    | 47.12 (31.60, 66.25)    | 2 (0.1)                            |
| Thallium   | 0.10 (0.06, 0.17)       | 0.08 (0.06, 0.12)       | 0.14 (0.09, 0.21)       | 317 (21.5)                         |
| Tungsten   | 0.22 (0.20, 0.60)       | 0.20 (0.18, 0.65)       | 0.24 (0.20, 0.55)       | 463 (31.3)                         |
| Zinc       | 452.38 (256.25, 736.60) | 341.45 (191.53, 602.46) | 543.50 (345.21, 858.30) | 0 (0.0)                            |

<sup>a</sup> Metal values are median (25<sup>th</sup>, 75<sup>th</sup> percentiles) for the metal listed in the row

**Supplemental Figure S1. Exposure-response functions of natural log-transformed (ln) urinary metal concentrations and odds estimates of metabolic syndrome (MetS) (n = 1478)**

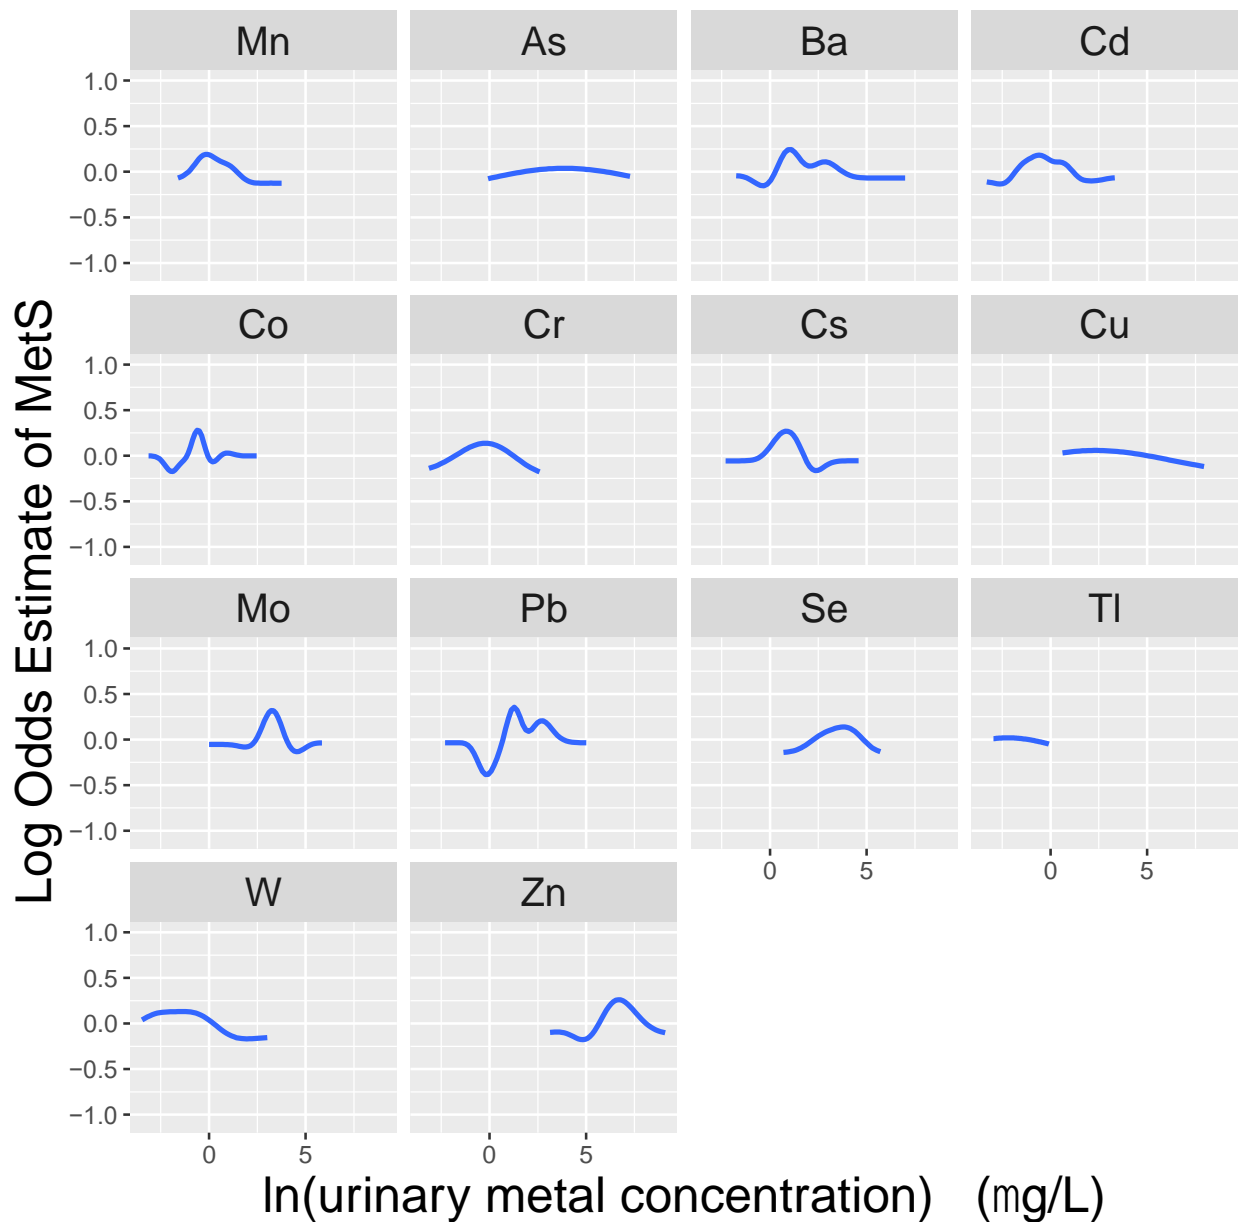

Models were adjusted for baseline values of sex, age (years), ethnicity (Hispanic, non-Hispanic), annual gross household income (<\$10,000, \$10,000-\$24,999, ≥\$25,000), smoking status (<100 cigarettes in lifetime (never), ≥100 cigarettes in lifetime and does not currently smoke (former), ≥100 cigarettes in lifetime and currently smokes (current)), caloric intake (kcal/day), and urinary creatinine (g/L). Metabolic syndrome was defined as having three or more of the following outcomes: 1) waist-hip ratio (waist circumference divided by iliac circumference) >0.90 for males, waist-hip ratio >0.85 for females, or a body mass index (measured weight divided by measured height squared) >30 kg/m<sup>2</sup>, 2) high density lipoprotein <40 mg/dL for males or <50 mg/dL for females, 3) triglycerides ≥150 mg/dL, 4) fasting glucose ≥100 mg/dL or diabetes (includes people who self-reported being diagnosed with diabetes via an oral glucose tolerance test or prescribed insulin or oral hyperglycemic medication), or 5) measured systolic blood pressure ≥130 mmHg or diastolic blood pressure ≥85 mmHg or self-reported current use of antihypertensive medications.

**Supplemental Table S2. Crude longitudinal associations <sup>a</sup> between baseline quartiles of manganese and metabolic outcomes**

|                                                       | Quartile 2<br>0.33–0.63 µg/L | Quartile 3<br>0.63–1.13 µg/L | Quartile 4<br>1.13–42.5 µg/L | <i>p-value<br/>for trend</i> |
|-------------------------------------------------------|------------------------------|------------------------------|------------------------------|------------------------------|
| Waist-hip ratio; <i>n</i> = 1477                      | –0.013 (–0.022, –0.004)      | –0.013 (–0.023, –0.004)      | –0.015 (–0.024, –0.005)      | <0.01*                       |
| Males                                                 | 0.002 (–0.005, 0.010)        | 0.000 (–0.007, 0.007)        | –0.001 (–0.007, 0.006)       | 0.69                         |
| Females                                               | –0.003 (–0.012, 0.006)       | –0.003 (–0.013, 0.006)       | –0.001 (–0.011, 0.009)       | 0.84                         |
| Body mass index (kg/m <sup>2</sup> ); <i>n</i> = 1477 | –0.06 (–0.74, 0.63)          | 0.23 (–0.47, 0.93)           | 0.45 (–0.26, 1.16)           | 0.16                         |
| Males                                                 | –0.03 (–0.88, 0.81)          | –0.51 (–1.34, 0.31)          | –0.21 (–1.03, 0.61)          | 0.43                         |
| Females                                               | –0.10 (–1.16, 0.96)          | 0.85 (–0.27, 1.97)           | 1.04 (–0.14, 2.22)           | 0.03*                        |
| High-density lipoprotein (mg/dL); <i>n</i> = 1476     | 0.03 (–1.80, 1.85)           | –0.25 (–2.11, 1.62)          | 0.85 (–1.05, 2.75)           | 0.46                         |
| Males                                                 | –0.83 (–3.14, 1.49)          | –0.26 (–2.52, 1.99)          | 0.14 (–2.11, 2.38)           | 0.80                         |
| Females                                               | –1.39 (–3.98, 1.19)          | –2.18 (–4.92, 0.55)          | –0.80 (–3.68, 2.08)          | 0.49                         |
| Triglycerides (mg/dL); <i>n</i> = 1477                | –12.3 (–29.8, 5.2)           | –7.5 (–25.4, 10.4)           | –14.0 (–32.2, 4.2)           | 0.21                         |
| Males                                                 | –3.0 (–23.5, 17.5)           | –8.9 (–28.8, 11.1)           | –19.3 (–39.1, 0.5)           | 0.047*                       |
| Females                                               | –21.3 (–50.6, 8.0)           | –7.6 (–38.7, 23.5)           | –9.0 (–41.7, 23.8)           | 0.83                         |
| Fasting glucose (mg/dL); <i>n</i> = 1475              | –0.2 (–7.7, 7.3)             | –7.2 (–14.9, 0.5)            | –10.1 (–17.9, –2.3)          | <0.01*                       |
| Males                                                 | 5.6 (–4.7, 15.9)             | –11.9 (–22.0, –1.9)          | –13.7 (–23.7, –3.7)          | <0.01*                       |
| Females                                               | –1.2 (–12.1, 9.6)            | –0.2 (–11.7, 11.3)           | –3.6 (–15.6, 8.5)            | 0.63                         |
| Systolic blood pressure (mmHg); <i>n</i> = 1477       | –2.9 (–5.5, –0.3)            | 0.3 (–2.3, 3.0)              | 0.3 (–2.4, 3.0)              | 0.37                         |
| Males                                                 | 0.0 (–3.5, 3.4)              | –2.6 (–6.0, 0.8)             | –0.6 (–3.9, 2.8)             | 0.49                         |
| Females                                               | –4.0 (–7.9, –0.2)            | 4.1 (0.0, 8.1)               | 2.4 (–1.9, 6.6)              | 0.02*                        |
| Diastolic blood pressure (mmHg); <i>n</i> = 1477      | –1.7 (–2.9, –0.5)            | –1.4 (–2.6, –0.2)            | –0.9 (–2.1, 0.3)             | 0.23                         |
| Males                                                 | –0.8 (–2.5, 0.9)             | –1.8 (–3.5, –0.2)            | –0.8 (–2.4, 0.9)             | 0.25                         |
| Females                                               | –1.3 (–2.9, 0.2)             | 0.0 (–1.6, 1.7)              | 0.1 (–1.6, 1.9)              | 0.48                         |

\**p*<0.05

<sup>a</sup> Associations assessed using linear mixed effects models with a random intercept for each participant. The reference group for manganese is the first quartile (≤ 0.33 µg/L).

**Supplemental Table S3. Adjusted longitudinal associations <sup>a</sup> between baseline quartiles of manganese and metabolic outcomes among participants with Mn levels above the limit of detection**

|                                                       | Quartile 2<br>0.33–0.63 µg/L | Quartile 3<br>0.63–1.13 µg/L | Quartile 4<br>1.13–42.5 µg/L | <i>p</i> -value<br>for trend |
|-------------------------------------------------------|------------------------------|------------------------------|------------------------------|------------------------------|
| Waist-hip ratio; <i>n</i> = 1235                      | 0.000 (–0.008, 0.008)        | –0.002 (–0.010, 0.006)       | 0.000 (–0.008, 0.008)        | 0.99                         |
| Males                                                 | 0.003 (–0.007, 0.014)        | 0.001 (–0.009, 0.012)        | 0.001 (–0.010, 0.011)        | 0.77                         |
| Females                                               | –0.002 (–0.014, 0.009)       | –0.002 (–0.013, 0.010)       | 0.002 (–0.010, 0.014)        | 0.54                         |
| Body mass index (kg/m <sup>2</sup> ); <i>n</i> = 1235 | –0.10 (–1.06, 0.86)          | –0.01 (–0.99, 0.96)          | 0.23 (–0.76, 1.22)           | 0.46                         |
| Males                                                 | –0.37 (–1.62, 0.88)          | –1.05 (–2.30, 0.19)          | –0.55 (–1.79, 0.69)          | 0.38                         |
| Females                                               | 0.09 (–1.30, 1.48)           | 0.71 (–0.73, 2.15)           | 0.90 (–0.61, 2.40)           | 0.12                         |
| High-density lipoprotein (mg/dL); <i>n</i> = 1235     | –0.88 (–3.30, 1.54)          | –0.90 (–3.35, 1.55)          | –0.07 (–2.55, 2.42)          | 0.72                         |
| Males                                                 | 0.22 (–3.15, 3.60)           | 1.35 (–2.01, 4.71)           | 1.15 (–2.18, 4.49)           | 0.36                         |
| Females                                               | –2.02 (–5.39, 1.35)          | –2.48 (–5.96, 1.01)          | –1.12 (–4.76, 2.53)          | 0.79                         |
| Triglycerides (mg/dL); <i>n</i> = 1236                | –25.6 (–50.6, –0.6)          | –22.7 (–48.0, 2.6)           | –29.6 (–55.3, –3.8)          | 0.10                         |
| Males                                                 | –18.0 (–48.4, 12.4)          | –24.6 (–54.7, 5.5)           | –30.8 (–60.7, –1.0)          | 0.045*                       |
| Females                                               | –30.5 (–70.2, 9.4)           | –24.4 (–65.6, 16.8)          | –26.0 (–69.1, 17.2)          | 0.51                         |
| Fasting glucose (mg/dL); <i>n</i> = 1234              | 5.6 (–4.2, 15.5)             | –5.0 (–15.0, 4.9)            | –8.5 (–18.6, 1.6)            | <0.01*                       |
| Males                                                 | 8.8 (–5.6, 23.2)             | –10.9 (–25.2, 3.4)           | –12.3 (–26.5, 1.9)           | <0.01*                       |
| Females                                               | 2.7 (–10.8, 16.1)            | –2.0 (–15.9, 12.0)           | –7.4 (–21.9, 7.2)            | 0.13                         |
| Systolic blood pressure (mmHg); <i>n</i> = 1235       | –2.2 (–5.4, 1.0)             | –0.9 (–4.2, 2.4)             | –2.2 (–5.5, 1.1)             | 0.46                         |
| Males                                                 | –1.6 (–6.3, 3.1)             | –3.8 (–8.5, 0.8)             | –3.4 (–8.0, 1.2)             | 0.11                         |
| Females                                               | –2.9 (–7.4, 1.6)             | 1.3 (–3.3, 6.0)              | –1.5 (–6.3, 3.3)             | 0.74                         |
| Diastolic blood pressure (mmHg); <i>n</i> = 1235      | –1.3 (–2.8, 0.3)             | –1.4 (–3.0, 0.2)             | –0.9 (–2.5, 0.7)             | 0.59                         |
| Males                                                 | –0.9 (–3.4, 1.6)             | –2.3 (–4.8, 0.2)             | –1.3 (–3.8, 1.1)             | 0.32                         |
| Females                                               | –1.6 (–3.6, 0.4)             | –0.6 (–2.7, 1.5)             | –0.6 (–2.8, 1.6)             | 0.74                         |

\**p* < 0.05

<sup>a</sup> Associations assessed using linear mixed effects models with a random intercept for each participant. The reference group for manganese is the first quartile (≤0.33 µg/L). Models are adjusted for baseline values of sex (except in sex-stratified models), age (years), ethnicity (Hispanic, non-Hispanic), annual gross household income (<\$10,000, \$10,000–\$24,999, ≥\$25,000), smoking status (<100 cigarettes in lifetime (never), ≥100 cigarettes in lifetime and does not currently smoke (former), ≥100 cigarettes in lifetime and currently smokes (current)), caloric intake (kcal/day), and urinary creatinine (g/L). Values reported are β (95% confidence interval).
